# Supplementary material for: Liquid–liquid phase equilibrium and the effect of a water-soluble polymer on the interaction between droplets in water-in-oil microemulsions
Source: Royal Society of Chemistry journal article supplement (doi:10.1039/c8sm01562g), 2018-01-01
Supplement: c8sm01562g1.pdf [file c8sm01562g1.pdf]

**Table S1. The critical volume fractions of the droplet and the critical temperatures for microemulsions  $\{(1-\phi_2) n\text{-decane} + \phi_2 (\text{AOT} + \text{water/PEG})\}$  with  $\omega=37.9$  and various concentrations  $c_{\text{PEG}}$  of PEG.**

| $c_{\text{PEG}}$ (g·L <sup>-1</sup> ) | $\phi_{2,c}$ | $T_c$ (K) |
|---------------------------------------|--------------|-----------|
| 0 <sup>a</sup>                        | 0.096        | 311.256   |
| 15                                    | 0.098        | 308.270   |
| 25                                    | 0.097        | 306.835   |
| 50                                    | 0.101        | 303.675   |
| 80                                    | 0.104        | 300.485   |
| 100                                   | 0.108        | 298.838   |

<sup>a</sup> Results from Ref [31] in manuscript.

**Table S2. Coexistence curves of  $(T, n)$  and  $(T, \phi_2)$  for  $\{(1-\phi_2) n\text{-decane} + \phi_2 (\text{AOT} + \text{water/PEG})\}$  with  $\omega=37.9$  and various PEG concentrations  $c_{\text{PEG}}$ . Refractive indices  $n$  were measured at wavelength  $\lambda = 632.8$  nm. Superscripts “+” and “-” denote the upper and the lower phases, respectively.**

| $T-T_c$<br>(K)                                                            | $n^+$  | $n^-$  | $\phi_2^+$ | $\phi_2^-$ | $T-T_c$<br>(K) | $n^+$  | $n^-$  | $\phi_2^+$ | $\phi_2^-$ |
|---------------------------------------------------------------------------|--------|--------|------------|------------|----------------|--------|--------|------------|------------|
| $c_{\text{PEG}} = 15 \text{g}\cdot\text{L}^{-1}, T_c = 308.270 \text{ K}$ |        |        |            |            |                |        |        |            |            |
| 0.011                                                                     | 1.4018 | 1.4008 | 0.079      | 0.123      | 1.126          | 1.4027 | 1.3985 | 0.014      | 0.205      |
| 0.026                                                                     | 1.4019 | 1.4007 | 0.074      | 0.128      | 1.328          | 1.4026 | 1.3982 | 0.014      | 0.215      |
| 0.046                                                                     | 1.402  | 1.4005 | 0.069      | 0.136      | 1.541          | 1.4026 | 1.3980 | 0.010      | 0.220      |
| 0.072                                                                     | 1.4021 | 1.4004 | 0.064      | 0.140      | 1.797          | 1.4025 | 1.3977 | 0.009      | 0.229      |
| 0.095                                                                     | 1.4022 | 1.4003 | 0.059      | 0.144      | 2.107          | 1.4024 | 1.3974 | 0.007      | 0.236      |
| 0.125                                                                     | 1.4023 | 1.4002 | 0.053      | 0.148      | 2.518          | 1.4023 | 1.3970 | 0.003      | 0.247      |
| 0.164                                                                     | 1.4024 | 1.4001 | 0.048      | 0.152      | 3.011          | 1.4021 | 1.3966 | 0.001      | 0.257      |
| 0.21                                                                      | 1.4024 | 1.4000 | 0.047      | 0.155      | 3.598          | 1.4018 | 1.3961 | 0.003      | 0.269      |
| 0.263                                                                     | 1.4025 | 1.3999 | 0.041      | 0.159      | 4.304          | 1.4015 | 1.3956 | 0.005      | 0.279      |
| 0.319                                                                     | 1.4025 | 1.3997 | 0.04       | 0.166      | 5.099          | 1.4011 | 1.3950 | 0.004      | 0.293      |
| 0.388                                                                     | 1.4026 | 1.3996 | 0.034      | 0.170      | 6.016          | 1.4007 | 1.3944 | 0.004      | 0.305      |
| 0.466                                                                     | 1.4026 | 1.3994 | 0.033      | 0.177      | 7.020          | 1.4002 | 1.3937 | 0.003      | 0.321      |
| 0.555                                                                     | 1.4026 | 1.3993 | 0.031      | 0.180      | 8.039          | 1.3998 | 1.3931 | 0.001      | 0.331      |
| 0.659                                                                     | 1.4027 | 1.3991 | 0.024      | 0.187      | 9.038          | 1.3993 | 1.3925 | 0.002      | 0.343      |
| 0.804                                                                     | 1.4027 | 1.3989 | 0.021      | 0.193      | 10.043         | 1.3989 | 1.3920 | 0.001      | 0.350      |
| 0.949                                                                     | 1.4027 | 1.3987 | 0.018      | 0.199      |                |        |        |            |            |
| $c_{\text{PEG}} = 25 \text{g}\cdot\text{L}^{-1}, T_c = 306.835 \text{ K}$ |        |        |            |            |                |        |        |            |            |

|       |        |        |       |       |       |        |        |       |       |
|-------|--------|--------|-------|-------|-------|--------|--------|-------|-------|
| 0.026 | 1.4026 | 1.4015 | 0.070 | 0.119 | 1.170 | 1.4033 | 1.3991 | 0.016 | 0.204 |
| 0.043 | 1.4027 | 1.4014 | 0.065 | 0.123 | 1.381 | 1.4032 | 1.3989 | 0.016 | 0.209 |
| 0.065 | 1.4028 | 1.4012 | 0.060 | 0.131 | 1.642 | 1.4031 | 1.3985 | 0.015 | 0.222 |
| 0.092 | 1.4029 | 1.4011 | 0.055 | 0.135 | 1.948 | 1.403  | 1.3982 | 0.013 | 0.230 |
| 0.127 | 1.4030 | 1.4009 | 0.050 | 0.143 | 2.305 | 1.4029 | 1.3978 | 0.010 | 0.242 |
| 0.168 | 1.4030 | 1.4008 | 0.049 | 0.147 | 2.719 | 1.4028 | 1.3974 | 0.006 | 0.253 |
| 0.211 | 1.4031 | 1.4007 | 0.044 | 0.150 | 3.215 | 1.4026 | 1.397  | 0.005 | 0.262 |
| 0.262 | 1.4031 | 1.4005 | 0.043 | 0.158 | 3.819 | 1.4023 | 1.3965 | 0.006 | 0.274 |
| 0.325 | 1.4032 | 1.4004 | 0.037 | 0.162 | 4.511 | 1.4021 | 1.396  | 0.006 | 0.285 |
| 0.402 | 1.4032 | 1.4002 | 0.036 | 0.169 | 5.319 | 1.4018 | 1.3955 | 0.004 | 0.295 |
| 0.493 | 1.4032 | 1.4001 | 0.034 | 0.172 | 6.222 | 1.4013 | 1.3949 | 0.005 | 0.307 |
| 0.601 | 1.4033 | 1.3999 | 0.027 | 0.179 | 7.275 | 1.4009 | 1.3942 | 0.002 | 0.322 |
| 0.731 | 1.4033 | 1.3997 | 0.025 | 0.185 | 8.301 | 1.4004 | 1.3936 | 0.002 | 0.333 |
| 0.881 | 1.4033 | 1.3995 | 0.022 | 0.191 | 9.456 | 1.3998 | 1.3929 | 0.006 | 0.347 |
| 1.005 | 1.4033 | 1.3993 | 0.019 | 0.198 |       |        |        |       |       |

---

$c_{\text{PEG}}=50\text{g}\cdot\text{L}^{-1}, T_c = 303.675\text{ K}$

---

|       |        |        |       |       |       |        |        |       |       |
|-------|--------|--------|-------|-------|-------|--------|--------|-------|-------|
| 0.021 | 1.4039 | 1.4027 | 0.073 | 0.128 | 0.994 | 1.4046 | 1.4005 | 0.021 | 0.211 |
| 0.038 | 1.4040 | 1.4026 | 0.068 | 0.132 | 1.196 | 1.4046 | 1.4002 | 0.017 | 0.221 |
| 0.055 | 1.4041 | 1.4025 | 0.063 | 0.136 | 1.453 | 1.4046 | 1.3999 | 0.011 | 0.230 |
| 0.077 | 1.4042 | 1.4023 | 0.058 | 0.145 | 1.762 | 1.4045 | 1.3995 | 0.009 | 0.243 |
| 0.106 | 1.4042 | 1.4022 | 0.058 | 0.149 | 2.132 | 1.4044 | 1.3992 | 0.009 | 0.250 |
| 0.143 | 1.4043 | 1.4021 | 0.052 | 0.153 | 2.595 | 1.4042 | 1.3987 | 0.007 | 0.266 |
| 0.189 | 1.4044 | 1.4019 | 0.047 | 0.161 | 3.166 | 1.4040 | 1.3982 | 0.006 | 0.279 |
| 0.245 | 1.4045 | 1.4018 | 0.041 | 0.165 | 3.871 | 1.4037 | 1.3977 | 0.004 | 0.290 |
| 0.305 | 1.4045 | 1.4016 | 0.040 | 0.173 | 4.733 | 1.4033 | 1.3970 | 0.004 | 0.309 |
| 0.377 | 1.4046 | 1.4015 | 0.034 | 0.176 | 5.655 | 1.4029 | 1.3963 | 0.003 | 0.327 |
| 0.459 | 1.4046 | 1.4013 | 0.032 | 0.184 | 6.795 | 1.4024 | 1.3956 | 0.002 | 0.341 |
| 0.560 | 1.4046 | 1.4011 | 0.030 | 0.191 | 7.905 | 1.4019 | 1.3949 | 0.002 | 0.357 |
| 0.683 | 1.4046 | 1.4009 | 0.027 | 0.198 | 9.205 | 1.4013 | 1.3942 | 0.002 | 0.369 |
| 0.825 | 1.4046 | 1.4007 | 0.024 | 0.204 |       |        |        |       |       |

---

$c_{\text{PEG}}=80\text{ g}\cdot\text{L}^{-1}, T_c = 300.485\text{ K}$

---

|       |        |        |       |       |       |        |        |       |       |
|-------|--------|--------|-------|-------|-------|--------|--------|-------|-------|
| 0.019 | 1.4051 | 1.4039 | 0.076 | 0.132 | 0.878 | 1.406  | 1.4017 | 0.018 | 0.219 |
| 0.030 | 1.4052 | 1.4038 | 0.072 | 0.136 | 0.979 | 1.406  | 1.4017 | 0.016 | 0.217 |
| 0.044 | 1.4053 | 1.4037 | 0.067 | 0.141 | 1.084 | 1.4059 | 1.4015 | 0.018 | 0.225 |
| 0.051 | 1.4053 | 1.4036 | 0.067 | 0.145 | 1.208 | 1.4059 | 1.4013 | 0.015 | 0.232 |

|                                                                             |        |        |       |       |        |        |        |       |       |
|-----------------------------------------------------------------------------|--------|--------|-------|-------|--------|--------|--------|-------|-------|
| 0.075                                                                       | 1.4054 | 1.4035 | 0.062 | 0.149 | 1.356  | 1.4059 | 1.4011 | 0.012 | 0.239 |
| 0.103                                                                       | 1.4055 | 1.4034 | 0.056 | 0.153 | 1.559  | 1.4058 | 1.4009 | 0.013 | 0.245 |
| 0.137                                                                       | 1.4056 | 1.4032 | 0.051 | 0.162 | 1.871  | 1.4058 | 1.4004 | 0.008 | 0.264 |
| 0.186                                                                       | 1.4056 | 1.403  | 0.050 | 0.171 | 2.417  | 1.4056 | 1.3999 | 0.007 | 0.279 |
| 0.241                                                                       | 1.4057 | 1.4029 | 0.045 | 0.174 | 2.913  | 1.4054 | 1.3995 | 0.006 | 0.290 |
| 0.291                                                                       | 1.4058 | 1.4028 | 0.039 | 0.178 | 3.659  | 1.4051 | 1.3989 | 0.004 | 0.306 |
| 0.371                                                                       | 1.4059 | 1.4026 | 0.033 | 0.186 | 4.683  | 1.4046 | 1.3981 | 0.003 | 0.329 |
| 0.437                                                                       | 1.4059 | 1.4025 | 0.031 | 0.189 | 5.709  | 1.4042 | 1.3974 | 0.002 | 0.347 |
| 0.510                                                                       | 1.4059 | 1.4023 | 0.030 | 0.198 | 7.093  | 1.4035 | 1.3965 | 0.003 | 0.369 |
| 0.603                                                                       | 1.4059 | 1.4022 | 0.028 | 0.201 | 8.469  | 1.4029 | 1.3958 | 0.002 | 0.382 |
| 0.684                                                                       | 1.406  | 1.4021 | 0.022 | 0.204 | 10.001 | 1.4022 | 1.3949 | 0.002 | 0.404 |
| 0.779                                                                       | 1.4059 | 1.4019 | 0.024 | 0.212 |        |        |        |       |       |
| $c_{\text{PEG}} = 100 \text{ g}\cdot\text{L}^{-1}, T_c = 298.838 \text{ K}$ |        |        |       |       |        |        |        |       |       |
| 0.013                                                                       | 1.4059 | 1.4049 | 0.086 | 0.134 | 0.863  | 1.4068 | 1.4025 | 0.024 | 0.233 |
| 0.025                                                                       | 1.4060 | 1.4047 | 0.081 | 0.143 | 0.950  | 1.4067 | 1.4024 | 0.027 | 0.236 |
| 0.036                                                                       | 1.4061 | 1.4046 | 0.076 | 0.148 | 1.056  | 1.4067 | 1.4022 | 0.024 | 0.244 |
| 0.052                                                                       | 1.4062 | 1.4045 | 0.071 | 0.152 | 1.182  | 1.4067 | 1.4020 | 0.021 | 0.251 |
| 0.073                                                                       | 1.4063 | 1.4044 | 0.065 | 0.156 | 1.339  | 1.4067 | 1.4018 | 0.018 | 0.258 |
| 0.098                                                                       | 1.4064 | 1.4042 | 0.060 | 0.166 | 1.535  | 1.4066 | 1.4016 | 0.018 | 0.264 |
| 0.130                                                                       | 1.4064 | 1.4041 | 0.059 | 0.170 | 1.835  | 1.4066 | 1.4013 | 0.012 | 0.273 |
| 0.175                                                                       | 1.4065 | 1.4039 | 0.053 | 0.178 | 2.420  | 1.4064 | 1.4007 | 0.010 | 0.292 |
| 0.223                                                                       | 1.4065 | 1.4038 | 0.052 | 0.182 | 3.019  | 1.4062 | 1.4002 | 0.007 | 0.306 |
| 0.274                                                                       | 1.4066 | 1.4036 | 0.046 | 0.191 | 3.703  | 1.4059 | 1.3996 | 0.006 | 0.323 |
| 0.344                                                                       | 1.4067 | 1.4035 | 0.040 | 0.194 | 4.712  | 1.4055 | 1.3989 | 0.004 | 0.340 |
| 0.420                                                                       | 1.4067 | 1.4033 | 0.038 | 0.202 | 5.730  | 1.4050 | 1.3983 | 0.003 | 0.352 |
| 0.513                                                                       | 1.4067 | 1.4031 | 0.036 | 0.210 | 7.065  | 1.4044 | 1.3973 | 0.002 | 0.380 |
| 0.606                                                                       | 1.4068 | 1.4030 | 0.029 | 0.213 | 8.471  | 1.4037 | 1.3966 | 0.005 | 0.391 |
| 0.693                                                                       | 1.4068 | 1.4028 | 0.027 | 0.221 | 9.968  | 1.4031 | 1.3957 | 0.001 | 0.413 |
| 0.773                                                                       | 1.4068 | 1.4027 | 0.026 | 0.225 |        |        |        |       |       |

**Table S3. Refractive indices  $n$  at wavelength  $\lambda = 632.8 \text{ nm}$  for pure  $n$ -Decane and  $\{(1 - \phi_2) n\text{-Decane} + \phi_2$  (AOT + water/PEG) with  $\omega = 37.9$  and various PEG concentrations  $c_{\text{PEG}}$ .**

| $c_{\text{PEG}} = 15 \text{ g}\cdot\text{L}^{-1}$ |              |     |              |     |              |     |
|---------------------------------------------------|--------------|-----|--------------|-----|--------------|-----|
| $\phi_2$                                          | $T/\text{K}$ | $n$ | $T/\text{K}$ | $n$ | $T/\text{K}$ | $n$ |

|                          |         |        |         |        |         |        |
|--------------------------|---------|--------|---------|--------|---------|--------|
| 0<br>( <i>n</i> -decane) | 307.828 | 1.4038 | 311.873 | 1.4019 | 318.555 | 1.3988 |
|                          | 308.844 | 1.4033 | 312.885 | 1.4014 | 320.620 | 1.3979 |
|                          | 309.829 | 1.4028 | 314.439 | 1.4007 |         |        |
|                          | 310.868 | 1.4023 | 316.513 | 1.3997 |         |        |
| 0.0300                   | 299.865 | 1.4067 | 304.621 | 1.4045 | 308.563 | 1.4028 |
|                          | 301.666 | 1.4059 | 306.217 | 1.4038 |         |        |
|                          | 303.061 | 1.4052 | 307.545 | 1.4032 |         |        |
| 0.0604                   | 298.652 | 1.4065 | 303.132 | 1.4045 | 307.611 | 1.4025 |
|                          | 300.112 | 1.4058 | 304.612 | 1.4038 |         |        |
|                          | 301.611 | 1.4051 | 306.110 | 1.4032 |         |        |
| 0.0902                   | 297.880 | 1.4061 | 302.436 | 1.4041 | 306.821 | 1.4022 |
|                          | 299.467 | 1.4054 | 303.923 | 1.4035 |         |        |
|                          | 300.944 | 1.4047 | 305.443 | 1.4028 |         |        |
| 0.1104                   | 297.317 | 1.4058 | 301.767 | 1.4039 | 306.261 | 1.4020 |
|                          | 298.780 | 1.4052 | 303.262 | 1.4033 |         |        |
|                          | 300.267 | 1.4045 | 304.762 | 1.4026 |         |        |
| 0.1499                   | 297.897 | 1.4046 | 302.475 | 1.4027 | 307.008 | 1.4008 |
|                          | 299.473 | 1.4039 | 303.985 | 1.4021 |         |        |
|                          | 300.989 | 1.4033 | 305.483 | 1.4014 |         |        |
| 0.2000                   | 297.896 | 1.4032 | 302.384 | 1.4013 | 306.892 | 1.3996 |
|                          | 299.389 | 1.4026 | 303.909 | 1.4008 |         |        |
|                          | 300.886 | 1.4020 | 305.386 | 1.4002 |         |        |
| 0.2504                   | 300.727 | 1.4008 | 305.281 | 1.3991 | 309.807 | 1.3973 |
|                          | 302.227 | 1.4002 | 306.803 | 1.3985 |         |        |
|                          | 303.776 | 1.3997 | 308.277 | 1.3979 |         |        |
| 0.3000                   | 306.793 | 1.3974 | 311.288 | 1.3957 |         |        |
|                          | 308.281 | 1.3968 | 312.264 | 1.3953 |         |        |
|                          | 309.778 | 1.3962 | 313.237 | 1.3950 |         |        |
| 0.4001                   | 311.756 | 1.3932 | 314.961 | 1.3921 | 317.979 | 1.3911 |
|                          | 312.928 | 1.3928 | 316.005 | 1.3917 |         |        |
|                          | 313.965 | 1.3924 | 316.997 | 1.3914 |         |        |

$c_{\text{PEG}} = 25 \text{ g}\cdot\text{L}^{-1}$

| $\phi_2$                 | $T/\text{K}$ | $n$    | $T/\text{K}$ | $n$    | $T/\text{K}$ | $n$    |
|--------------------------|--------------|--------|--------------|--------|--------------|--------|
| 0<br>( <i>n</i> -decane) | 297.845      | 1.4083 | 303.095      | 1.4059 | 309.838      | 1.4028 |
|                          | 299.126      | 1.4078 | 304.690      | 1.4052 | 311.731      | 1.4019 |
|                          | 300.330      | 1.4072 | 306.220      | 1.4045 | 313.845      | 1.4010 |
|                          | 301.565      | 1.4066 | 307.992      | 1.4037 |              |        |
| 0.0348                   | 296.045      | 1.4083 | 299.889      | 1.4066 | 303.567      | 1.4049 |
|                          | 297.332      | 1.4077 | 300.951      | 1.4061 | 305.109      | 1.4042 |
|                          | 298.508      | 1.4072 | 302.359      | 1.4055 |              |        |
| 0.0691                   | 296.985      | 1.4070 | 300.825      | 1.4053 | 304.848      | 1.4036 |
|                          | 298.391      | 1.4064 | 302.136      | 1.4048 | 306.256      | 1.4030 |
|                          | 299.768      | 1.4058 | 303.183      | 1.4043 |              |        |

|        |         |        |         |        |         |        |
|--------|---------|--------|---------|--------|---------|--------|
| 0.0970 | 297.728 | 1.4059 | 301.429 | 1.4044 | 305.467 | 1.4026 |
|        | 298.941 | 1.4055 | 302.788 | 1.4038 | 306.769 | 1.4021 |
|        | 300.277 | 1.4049 | 304.202 | 1.4032 |         |        |
| 0.1657 | 297.093 | 1.4045 | 300.989 | 1.4029 | 304.880 | 1.4013 |
|        | 298.202 | 1.4040 | 302.248 | 1.4024 | 306.553 | 1.4006 |
|        | 299.485 | 1.4035 | 303.734 | 1.4017 |         |        |
| 0.2009 | 296.015 | 1.4040 | 300.028 | 1.4024 | 304.598 | 1.4006 |
|        | 297.513 | 1.4034 | 301.764 | 1.4017 | 306.233 | 1.3999 |
|        | 298.884 | 1.4028 | 302.947 | 1.4012 |         |        |
| 0.2661 | 296.861 | 1.4020 | 300.438 | 1.4007 | 304.915 | 1.3989 |
|        | 298.240 | 1.4015 | 301.906 | 1.4001 | 306.259 | 1.3984 |
|        | 299.381 | 1.4011 | 303.262 | 1.3996 |         |        |
| 0.3218 | 297.437 | 1.4004 | 301.169 | 1.3990 | 305.160 | 1.3975 |
|        | 298.549 | 1.4000 | 302.213 | 1.3986 | 306.650 | 1.3970 |
|        | 299.898 | 1.3995 | 303.523 | 1.3981 |         |        |
| 0.3992 | 296.491 | 1.3988 | 300.415 | 1.3974 | 304.769 | 1.3959 |
|        | 297.790 | 1.3983 | 301.905 | 1.3969 | 306.507 | 1.3953 |
|        | 299.253 | 1.3978 | 303.189 | 1.3964 |         |        |

$c_{\text{PEG}} = 50 \text{ g}\cdot\text{L}^{-1}$

| $\phi_2$                 | $T/\text{K}$ | $n$    | $T/\text{K}$ | $n$    | $T/\text{K}$ | $n$    |
|--------------------------|--------------|--------|--------------|--------|--------------|--------|
| 0<br>( <i>n</i> -decane) | 293.630      | 1.4101 | 300.882      | 1.4068 | 309.048      | 1.4031 |
|                          | 295.288      | 1.4094 | 302.580      | 1.4061 | 310.890      | 1.4022 |
|                          | 297.107      | 1.4085 | 304.573      | 1.4052 |              |        |
|                          | 299.098      | 1.4077 | 306.639      | 1.4042 |              |        |
| 0.0295                   | 293.409      | 1.4095 | 297.570      | 1.4076 | 302.252      | 1.4055 |
|                          | 295.038      | 1.4088 | 298.964      | 1.4070 | 303.871      | 1.4048 |
|                          | 296.517      | 1.4081 | 300.498      | 1.4063 |              |        |
| 0.0684                   | 293.658      | 1.4084 | 298.102      | 1.4065 | 302.327      | 1.4046 |
|                          | 294.961      | 1.4079 | 299.454      | 1.4059 |              |        |
|                          | 296.406      | 1.4072 | 301.083      | 1.4052 |              |        |
| 0.1010                   | 294.242      | 1.4074 | 297.800      | 1.4059 | 301.758      | 1.4042 |
|                          | 295.300      | 1.4070 | 299.150      | 1.4053 | 303.639      | 1.4034 |
|                          | 296.482      | 1.4064 | 300.206      | 1.4049 |              |        |
| 0.1496                   | 293.337      | 1.4066 | 297.783      | 1.4047 | 302.126      | 1.4030 |
|                          | 294.840      | 1.4060 | 298.938      | 1.4043 | 303.657      | 1.4023 |
|                          | 296.070      | 1.4054 | 300.502      | 1.4036 |              |        |
| 0.2025                   | 293.391      | 1.4054 | 297.648      | 1.4036 | 302.211      | 1.4018 |
|                          | 294.914      | 1.4047 | 299.407      | 1.4029 | 303.907      | 1.4011 |
|                          | 296.100      | 1.4042 | 300.460      | 1.4025 |              |        |
| 0.2555                   | 293.496      | 1.4039 | 297.873      | 1.4022 | 302.300      | 1.4005 |
|                          | 294.822      | 1.4034 | 299.270      | 1.4017 | 303.851      | 1.3999 |
|                          | 296.395      | 1.4028 | 300.492      | 1.4012 |              |        |
| 0.3233                   | 293.251      | 1.4023 | 296.980      | 1.4009 | 301.266      | 1.3994 |

|        |         |        |         |        |         |        |
|--------|---------|--------|---------|--------|---------|--------|
|        | 294.378 | 1.4019 | 297.966 | 1.4006 | 303.095 | 1.3987 |
|        | 295.687 | 1.4014 | 299.463 | 1.4001 |         |        |
|        | 293.691 | 1.4003 | 297.937 | 1.3988 | 302.534 | 1.3972 |
| 0.3994 | 295.145 | 1.3998 | 299.675 | 1.3982 | 304.395 | 1.3966 |
|        | 296.365 | 1.3994 | 300.734 | 1.3978 |         |        |

$c_{\text{PEG}} = 80 \text{ g}\cdot\text{L}^{-1}$

| $\phi_2$                 | $T/\text{K}$ | $n$    | $T/\text{K}$ | $n$    | $T/\text{K}$ | $n$    |
|--------------------------|--------------|--------|--------------|--------|--------------|--------|
| 0<br>( <i>n</i> -decane) | 299.499      | 1.4073 | 305.544      | 1.4045 | 311.586      | 1.4017 |
|                          | 301.000      | 1.4065 | 307.066      | 1.4038 |              |        |
|                          | 302.513      | 1.4059 | 308.587      | 1.4031 |              |        |
|                          | 304.018      | 1.4051 | 310.089      | 1.4024 |              |        |
| 0.0300                   | 293.857      | 1.4092 | 296.818      | 1.4079 | 299.859      | 1.4065 |
|                          | 294.812      | 1.4088 | 297.821      | 1.4074 |              |        |
|                          | 295.815      | 1.4083 | 298.835      | 1.4070 |              |        |
| 0.0609                   | 293.547      | 1.4085 | 296.561      | 1.4072 | 299.820      | 1.4058 |
|                          | 294.547      | 1.4081 | 297.565      | 1.4067 |              |        |
|                          | 295.551      | 1.4077 | 298.561      | 1.4063 |              |        |
| 0.0854                   | 293.346      | 1.4080 | 296.357      | 1.4067 | 299.500      | 1.4054 |
|                          | 294.346      | 1.4076 | 297.356      | 1.4062 |              |        |
|                          | 295.345      | 1.4071 | 298.378      | 1.4058 |              |        |
| 0.1091                   | 293.509      | 1.4074 | 296.502      | 1.4061 | 299.542      | 1.4048 |
|                          | 294.496      | 1.4070 | 297.499      | 1.4057 |              |        |
|                          | 295.498      | 1.4065 | 298.504      | 1.4053 |              |        |
| 0.1494                   | 293.825      | 1.4064 | 296.871      | 1.4051 | 299.883      | 1.4039 |
|                          | 294.844      | 1.4060 | 297.867      | 1.4047 |              |        |
|                          | 295.853      | 1.4055 | 298.871      | 1.4043 |              |        |
| 0.2002                   | 294.699      | 1.4048 | 297.760      | 1.4036 | 300.835      | 1.4024 |
|                          | 295.716      | 1.4045 | 298.784      | 1.4032 |              |        |
|                          | 296.710      | 1.4040 | 299.802      | 1.4028 |              |        |
| 0.2499                   | 295.622      | 1.4034 | 298.573      | 1.4023 | 301.614      | 1.4011 |
|                          | 296.704      | 1.4030 | 299.594      | 1.4019 |              |        |
|                          | 297.548      | 1.4027 | 300.606      | 1.4015 |              |        |
| 0.2996                   | 297.124      | 1.4017 | 300.133      | 1.4006 | 303.156      | 1.3994 |
|                          | 298.122      | 1.4013 | 301.142      | 1.4002 |              |        |
|                          | 299.136      | 1.4009 | 302.243      | 1.3998 |              |        |
| 0.4047                   | 298.231      | 1.3990 | 301.723      | 1.3978 | 305.125      | 1.3966 |
|                          | 299.262      | 1.3986 | 302.737      | 1.3974 |              |        |
|                          | 300.328      | 1.3983 | 303.787      | 1.3971 |              |        |

$c_{\text{PEG}} = 100 \text{ g}\cdot\text{L}^{-1}$

| $\phi_2$            | $T/\text{K}$ | $n$    | $T/\text{K}$ | $n$    | $T/\text{K}$ | $n$    |
|---------------------|--------------|--------|--------------|--------|--------------|--------|
| 0                   | 298.826      | 1.4077 | 304.090      | 1.4053 | 309.364      | 1.4029 |
| ( <i>n</i> -decane) | 300.128      | 1.4071 | 305.381      | 1.4047 | 310.571      | 1.4023 |

|        |         |        |         |        |         |        |
|--------|---------|--------|---------|--------|---------|--------|
|        | 301.398 | 1.4065 | 306.676 | 1.4041 |         |        |
|        | 302.797 | 1.4059 | 308.017 | 1.4035 |         |        |
| 0.0344 | 298.255 | 1.4073 | 295.469 | 1.4085 | 292.903 | 1.4097 |
|        | 297.331 | 1.4077 | 294.603 | 1.4089 |         |        |
|        | 296.405 | 1.4081 | 293.729 | 1.4093 |         |        |
| 0.0617 | 297.961 | 1.4068 | 295.224 | 1.4080 | 292.422 | 1.4092 |
|        | 296.979 | 1.4072 | 294.291 | 1.4084 |         |        |
|        | 295.979 | 1.4076 | 293.354 | 1.4088 |         |        |
| 0.0946 | 291.738 | 1.4088 | 294.802 | 1.4075 | 297.964 | 1.4061 |
|        | 292.751 | 1.4083 | 295.832 | 1.4070 |         |        |
|        | 293.772 | 1.4079 | 296.964 | 1.4065 |         |        |
| 0.1144 | 298.144 | 1.4055 | 295.054 | 1.4069 | 291.782 | 1.4082 |
|        | 297.159 | 1.4060 | 293.948 | 1.4073 |         |        |
|        | 296.086 | 1.4064 | 292.849 | 1.4078 |         |        |
| 0.1579 | 292.421 | 1.4070 | 295.409 | 1.4058 | 298.258 | 1.4046 |
|        | 293.420 | 1.4066 | 296.350 | 1.4054 |         |        |
|        | 294.443 | 1.4062 | 297.271 | 1.4050 |         |        |
| 0.1953 | 293.333 | 1.4059 | 296.291 | 1.4047 | 299.313 | 1.4035 |
|        | 294.338 | 1.4055 | 297.245 | 1.4043 |         |        |
|        | 295.310 | 1.4051 | 298.309 | 1.4039 |         |        |
| 0.2490 | 299.495 | 1.4023 | 296.405 | 1.4035 | 293.307 | 1.4047 |
|        | 298.462 | 1.4027 | 295.363 | 1.4039 |         |        |
|        | 297.421 | 1.4031 | 294.339 | 1.4043 |         |        |
| 0.3004 | 295.198 | 1.4028 | 298.405 | 1.4016 | 301.612 | 1.4004 |
|        | 296.284 | 1.4024 | 299.470 | 1.4012 |         |        |
|        | 297.344 | 1.4020 | 300.536 | 1.4008 |         |        |
| 0.3960 | 307.030 | 1.3966 | 303.930 | 1.3976 | 300.887 | 1.3987 |
|        | 305.985 | 1.3969 | 302.939 | 1.3980 |         |        |
|        | 304.966 | 1.3973 | 301.841 | 1.3984 |         |        |
